# Supplementary material
Source: PubMed Central journal article supplement (PMC6646065)
Supplement: NIHMS1530997-supplement-Supplemental_Material.pdf [file NIHMS1530997-supplement-Supplemental_Material.pdf]

SUPPLEMENTAL MATERIAL

Supplemental Table I. Characteristics of all versus patients stratified by ADC core lesion reversal by 24 hours

|                                                                                               | All patients<br>(n=50) | Patients achieving<br>ADC core lesion<br>reversal by 24 hours<br>(n=26) | Patients <u>not</u><br>achieving ADC core<br>lesion reversal by 24<br>hours<br>(n=24) | p-value          |
|-----------------------------------------------------------------------------------------------|------------------------|-------------------------------------------------------------------------|---------------------------------------------------------------------------------------|------------------|
| Age, median [IQR]                                                                             | 66 [50-74]             | 64 [49-73]                                                              | 67 [50-77]                                                                            | 0.527            |
| Women (%)                                                                                     | 34 (68%)               | 19 (73%)                                                                | 15 (63%)                                                                              | 0.453            |
| Transferred from outside hospital                                                             | 15 (30%)               | 9 (35%)                                                                 | 6 (25%)                                                                               | 0.446            |
| Baseline NIHSS, median [IQR]                                                                  | 18 [11-22]             | 19 [8-23]                                                               | 17 [12-21]                                                                            | 0.748            |
| IV tPA administered                                                                           | 40 (80%)               | 18 (69%)                                                                | 22 (92%)                                                                              | <b>0.044</b>     |
| Time Onset to IV tPA (min), median [IQR]                                                      | 148 [103-182]          | 120 [83-178]                                                            | 158 [127-188]                                                                         | 0.116            |
| Large vessel occlusion (LVO) location on cerebral angiogram or COW MRA (%) ^                  |                        |                                                                         |                                                                                       |                  |
| Intracranial ICA                                                                              | 5 (10%)                | 3 (12%)                                                                 | 2 (9%)                                                                                | 0.657            |
| MCA: M1                                                                                       | 32 (65%)               | 19 (76%)                                                                | 13 (57%)                                                                              |                  |
| MCA: M2 or other                                                                              | 12 (25%)               | 4 (16%)                                                                 | 9 (39%)                                                                               |                  |
| Baseline ADC Core lesion (mL), with<br>ADC $\leq 620 \mu\text{m}^2/\text{sec}$ , median [IQR] | 18 [1-53]              | 8 [1-43]                                                                | 30 [4-95]                                                                             | 0.174            |
| Baseline ADC intensity value of Core<br>lesion, median [IQR]                                  | 485 [449-518]          | 500 [464-535]                                                           | 463 [423-499]                                                                         | <b>0.015</b>     |
| Baseline Tmax>6 sec volume (mL),<br>median [IQR]                                              | 178 [110-267]          | 197 [118-267]                                                           | 166 [81-269]                                                                          | 0.824            |
| Revascularization by 24 hours (%)                                                             | 32 (56%)               | 24 (92%)                                                                | 8 (33%)                                                                               | <b>&lt;0.001</b> |
| Percent of Core with ADC $\leq 620$<br>$\mu\text{m}^2/\text{sec}$ at 24 hours, median [IQR]   | 48% [14-86]            | 16% [6-33]                                                              | 88% [69-99]                                                                           | <b>&lt;0.001</b> |
| ADC intensity value of Core lesion at<br>24 hours, median [IQR]                               | 640 [468-732]          | 730 [684-796]                                                           | 468 [381-586]                                                                         | <b>&lt;0.001</b> |
| DWI lesion volume (mL) at 24 hours,<br>median [IQR]                                           | 40 [14-134]            | 27 [9-46]                                                               | 79 [34-189]                                                                           | <b>0.001</b>     |
| Early Neurologic Improvement (ENI)<br>at 24 hours (%)                                         | 19/49 (38%)            | 16/25 (64%)                                                             | 3 (13%)                                                                               | <b>&lt;0.001</b> |
| NIHSS at Discharge                                                                            | 4 [0-13]               | 3 [0-7]                                                                 | 9 [0-21]                                                                              | 0.113            |
| DWI Lesion Volume at 5 days,<br>median [IQR]                                                  | 43 [18-107]            | 35 [15-67]                                                              | 63 [23-173]                                                                           | <b>0.038</b>     |
| Good clinical outcome (GCO),<br>mRS 0-2 at 90 days                                            | 16/35 (46%)            | 13/20 (65%)                                                             | 3/15 (20%)                                                                            | <b>0.009</b>     |

IQR, interquartile range; NIHSS, National Institutes of Health Stroke Scale; ICA, internal carotid artery; MCA, middle cerebral artery; tPA, tissue plasminogen activator; TICl, Thrombolysis in Cerebral Infarction; mRS, modified Rankin Scale

^Two patients, one from each stratified group, did not have visible large vessel occlusions on cerebral angiogram or COW MRA
